# Supplementary material
Source: MDPI journal article supplement (https://www.mdpi.com/2227-9040/7/2/23)
Supplement: s1 [file s1]

## Supplementary Materials

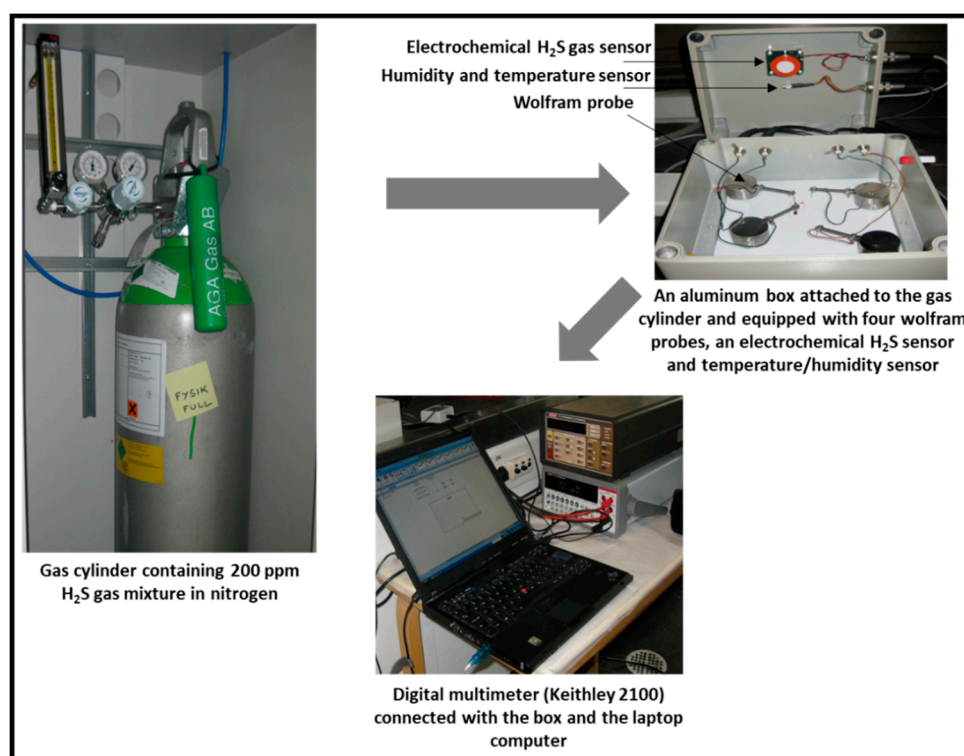

**Figure S1.** Pictures showing the experimental setup.

**Table S1:** Average RGB values of the sensing films on paper substrate towards different concentrations of H<sub>2</sub>S with print density of 2028 drops/mm<sup>2</sup>, 8112 drops/mm<sup>2</sup> and 16224 drops/mm<sup>2</sup>

| <b>Sample 1: 2028<br/>drops/mm<sup>2</sup></b> | <b>R<br/>mean</b> | <b>G<br/>mean</b> | <b>B<br/>mean</b> |
|------------------------------------------------|-------------------|-------------------|-------------------|
| Reference                                      | 229.6             | 229.6             | 229.6             |
| Exposed to 200 ppb                             | 219               | 208               | 188.7             |
| Exposed to 1.5 ppm                             | 211               | 191.6             | 155               |
| Exposed to 5 ppm                               | 204.6             | 178               | 129               |
| Exposed to 10 ppm                              | 203               | 173.5             | 121.6             |
| <b>Sample 4: 8112<br/>drops/mm<sup>2</sup></b> |                   |                   |                   |
| Reference                                      | 212.5             | 205.5             | 186.5             |
| Exposed to 200 ppb                             | 213.4             | 207.4             | 186.5             |

|                             |       |       |       |
|-----------------------------|-------|-------|-------|
| Exposed to 1.5 ppm          | 209   | 197.3 | 165.4 |
| Exposed to 5 ppm            | 199.8 | 180.5 | 135.3 |
| Exposed to 10 ppm           | 182   | 148.3 | 92    |
| <b>Sample 8: 16224</b>      |       |       |       |
| <b>drops/mm<sup>2</sup></b> |       |       |       |
| Reference                   | 203.5 | 202.5 | 182.5 |
| Exposed to 200 ppb          | 206   | 205   | 185.5 |
| Exposed to 1.5 ppm          | 202.9 | 200   | 175   |
| Exposed to 5 ppm            | 190.5 | 174.9 | 131.8 |
| Exposed to 10 ppm           | 163.7 | 141.3 | 85    |
